# Supplementary material for: Self-care and lifestyle interventions of complementary and integrative medicine during the COVID-19 pandemic—A cross-sectional study
Source: Front Med (Lausanne). 2023 Jan 9;9:1033181. doi: 10.3389/fmed.2022.1033181 (PMC9868272; doi:10.3389/fmed.2022.1033181)
Supplement: Supplementary file 1 [file Table_1.xlsx]

## Sheet: Sheet1
Supplementary Material
Table S1: Chronic diseases, alcohol/cigarette use and sick leave
			Gender				Age								COVID-19				Other infectious respiratory diseases				Mental/Emotional Status
	All		F		M		18-30		31-50		51-65		≥66		Yes		No		Yes		No		"Positive"		"Negative"
	N	Perc	N	Perc	N	Perc	N	Perc	N	Perc	N	Perc	N	Perc	N	Perc	N	Perc	N	Perc	N	Perc	N	Perc	N	Perc
BMI (Mean±SD)	23.85±6.3		23.83±6.8		23.88±3.14		21.97±3.36		24.07±9.01		24.2±4.3		23.76±3.65		23.33±3.64		23.88±6.42		23.77±4.61		23.89±6.99		23.81±7.56		24.94±5.71
_Underweight (<18.5 kg/m2)	36	3.2	32	3.5	4	1.9	7	5.3	15	3.7	9	1.8	5	4.5	2	3.2	34	3.2	11	2.9	25	3.3	20	3.5	4	4.6
_Normal range (18.5-24.9 kg/m2)	793	69.7	646	69.7	145	70	107	81.1	284	70.5	331	67.3	71	64	46	74.2	747	69.4	259	69.1	534	70	411	71.1	46	52.9
_Overweight (25.0-29.9 kg/m2)	226	19.9	174	18.8	51	24.6	13	9.8	73	18.1	111	22.6	29	26.1	11	17.7	215	20	70	18.7	156	20.4	109	18.9	23	26.4
_Obese (Class I) (30.0-34.9 kg/m2)	54	4.7	48	5.2	6	2.9	3	2.3	17	4.2	29	5.9	5	4.5	2	3.2	52	4.8	26	6.9	28	3.7	26	4.5	8	9.2
_Obese (Class II) (35.0-39.9 kg/m2)	14	1.2	13	1.4	1	0.5	1	0.8	6	1.5	6	1.2	1	0.9	1	1.6	13	1.2	3	0.8	11	1.4	6	1	3	3.4
_Obese (Class III) (≥40.0 kg/m2)	15	1.3	14	1.5	0	0	1	0.8	8	2	6	1.2	0	0	0	0	15	1.4	6	1.6	9	1.2	6	1	3	3.4
Presence of chronic cardiovascular disease	108	9.5	85	9.2	23	11.1	2	1.5	16	4	61	12.4	29	26.1	6	9.7	102	9.5	40	10.7	68	8.9	54	9.3	12	13.8
_Hypertension	82	7.2	70	7.6	12	5.8	9	6.8	27	6.7	37	7.5	9	8.1	4	6.5	78	7.2	23	6.1	59	7.7	46	8	6	6.9
_Coronary heart disease	7	0.6	7	0.8	0	0	2	1.5	1	0.2	4	0.8	0	0	0	0	7	0.7	3	0.8	4	0.5	5	0.9	1	1.1
_Heart attack	3	0.3	3	0.3	0	0	1	0.8	0	0	2	0.4	0	0	0	0	3	0.3	1	0.3	2	0.3	1	0.2	1	1.1
_Heart failure	7	0.6	6	0.6	1	0.5	1	0.8	2	0.5	3	0.6	1	0.9	0	0	7	0.7	3	0.8	4	0.5	4	0.7	1	1.1
_Stroke	2	0.2	2	0.2	0	0	0	0	2	0.5	0	0	0	0	0	0	2	0.2	1	0.3	1	0.1	0	0	1	1.1
_Other chronic cardiovascular diseases	16	1.4	13	1.4	3	1.4	3	2.3	6	1.5	6	1.2	1	0.9	1	1.6	15	1.4	8	2.1	8	1	9	1.6	2	2.3
Presence of chronic respiratory disease	120	10.5	105	11.3	13	6.3	11	8.3	34	8.4	59	12	16	14.4	4	6.5	116	10.8	61	16.3	59	7.7	55	9.5	16	18.4
_Asthma	70	6.2	59	6.4	10	4.8	8	6.1	27	6.7	31	6.3	4	3.6	0	0	70	6.5	21	5.6	49	6.4	37	6.4	1	1.1
_COPD	21	1.8	20	2.2	1	0.5	2	1.5	8	2	9	1.8	2	1.8	1	1.6	20	1.9	7	1.9	14	1.8	10	1.7	4	4.6
_Pulmonary emphysema	3	0.3	3	0.3	0	0	0	0	0	0	3	0.6	0	0	0	0	3	0.3	2	0.5	1	0.1	1	0.2	0	0
_Other chronic respiratory diseases	28	2.5	24	2.6	4	1.9	3	2.3	14	3.5	7	1.4	4	3.6	1	1.6	27	2.5	9	2.4	19	2.5	16	2.8	0	0
Alcohol	379	33.3	306	33	72	34.8	31	23.5	119	29.5	187	38	42	37.8	26	41.9	353	32.8	128	34.1	251	32.9	183	31.7	30	34.5
_Alcoholic drinks (units/week) (Mean±SD)	6.39±7.71		5.34±5.78		10.9±12.14		4.9±7.5		6.33±6.69		6.25±8.78		8.26±4.85		4.1±3.33		6.56±7.91		6.62±7.74		6.27±7.71		6.65±8.57		6.85±8.62	8.62
Cigarettes	94	8.3	76	8.2	17	8.2	10	7.6	46	11.4	33	6.7	5	4.5	2	3.2	92	8.6	31	8.3	63	8.3	40	6.9	9	10.3
_Cigarettes (units/week) (Mean±SD)	7.81±6.42		7.36±5.99		9.12±7.74		6.45±6.18		6.97±5.97		9.33±6.64		8.2±9.42		7.5±3.54		7.82±6.48		6.55±5.64		8.43±6.73		6.9±6.13		8.67±6.54	6.54
Sick leave since March 2020	259	22.8	221	23.8	36	17.4	33	25	112	27.8	110	22.4	4	3.6	37	59.7	222	20.6	132	35.2	127	16.6	121	20.9	32	36.8
_Days on sick leave since March 2020 (Mean±SD)	8.86±39.51		9.72±41.37		3.71±21.96		5.43±29.65		9.72±42.67		10.95±43.17		0.5±3.26		15.26±39.21		8.49±39.52		10.55±42.43		8.03±37.99		6.72±30.1		19.86±58.82
Table S2: Affectedness by COVID-19
			Gender				Age								COVID-19				Other infectious respiratory diseases				Mental/Emotional Status
	All		F		M		18-30		31-50		51-65		≥66		Yes		No		Yes		No		"Positive"		"Negative"
	N	Perc	N	Perc	N	Perc	N	Perc	N	Perc	N	Perc	N	Perc	N	Perc	N	Perc	N	Perc	N	Perc	N	Perc	N	Perc
Tested positive for SARS-CoV-2	62	5.4	50	5.4	12	5.8	11	8.3	22	5.5	28	5.7	1	0.9	62	100	0	0	17	4.5	45	5.9	34	5.9	5	5.7
Presence of symptoms of COVID-19 disease	51	4.5	42	4.5	9	4.3	8	6.1	19	4.7	23	4.7	1	0.9	51	82.3	0	0	11	2.9	40	5.2	29	5	4	4.6
_Cough (NRS 0 = not at all - 10 = fully) (Mean±SD)	3.47±2.33		3.57±2.47		3±1.5		3.62±2.45		4.05±2.41		2.96±2.25		3±0		3.47±2.33		0		3.91±2.81		3.35±2.2		2.72±2.25		4.5±1.29	1.29
_Cold (Mean±SD)	3.12±2.52		3.31±2.7		2.22±1.09		4.62±3.62		3.47±2.8		2.22±1.38		5±0		3.12±2.52		0		4.18±3.06		2.83±2.31		2.52±2.23		4.75±3.3	3.3
_Headache (Mean±SD)	5±3.1		5.5±3.1		2.67±1.8		4.75±2.6		6.21±3.07		4±3.07		7±0		5±3.1		0		6.64±3.56		4.55±2.85		5±3.22		7.25±1.5	1.5
_Fever (Mean±SD)	4.1±2.86		4.12±2.84		4±3.12		5.62±2.72		4.37±3.08		3.39±2.64		3±0		4.1±2.86		0		4.82±2.86		3.9±2.86		3.59±2.57		4.25±2.63	2.63
_Taste (Mean±SD)	5.96±4.15		6.1±4.2		5.33±4.09		5.38±4.21		6.79±4.08		5.3±4.24		10±0		5.96±4.15		0		8.73±2.65		5.2±4.18		5.38±4.2		10±0	0
_Throat ache (Mean±SD)	2.75±2.34		2.64±2.3		3.22±2.59		3.5±2.78		2.11±1.76		3.09±2.57		1±0		2.75±2.34		0		3.82±2.71		2.45±2.17		2.34±2.06		3.5±3.32	3.32
_Dyspnea (Mean±SD)	3.1±2.62		3.31±2.7		2.11±2.03		3.38±2.62		3±2.21		3.17±3.02		1±0		3.1±2.62		0		3.45±2.94		3±2.55		2.45±2.21		3.75±2.5	2.5
_Muscle pain (Mean±SD)	4.35±3.09		4.55±3.22		3.44±2.35		4.38±3.54		4.26±3.23		4.39±3.03		5±0		4.35±3.09		0		6.45±2.62		3.77±2.98		4.28±3.19		6±3.92	3.92
_Exhaustion (Mean±SD)	6.71±2.69		6.81±2.61		6.22±3.19		8.12±2.23		6.37±2.39		6.48±3.06		7±0		6.71±2.69		0		8.09±1.3		6.33±2.86		6.38±2.78		6.75±4.03	4.03
Days in total of COVID-19 symptoms	19.1±23.27		21.24±25		9.11±6.81		12.75±4.5		20.32±27.78		20.09±23.98		24		19.1±23.27		0		17.45±15.31		19.55±25.17		13.41±12.53		17±9.63
Strength of other COVID-19 symptoms (NRS 0 = not at all - 10 = fully) (Mean±SD)	7.23±3.86		7.52±3.75		6±4.22		6.36±4.54		7.27±3.64		7.43±3.88		10±0		7.23±3.86		0		6.24±4.78		7.6±3.44		7.26±3.72		8±4.47	4.47
Presence of Post-Covid symptoms	29	2.5	25	2.7	4	1.9	4	3	11	2.7	13	2.6	1	0.9	29	46.8	0	0	9	2.4	20	2.6	14	2.4	3	3.4
_Severity of Post-Covid symptoms? (Mean±SD)	3.9±3.87		4.21±3.95		2.44±3.24		4±4.5		4±3.79		3.74±3.97		5±0		3.9±3.87		0		5.73±3.5		3.4±3.86		2.9±3.58		5.75±4.35	4.35
Compliance with general hygiene regulations (NRS 0 = not at all - 10 = fully) (Mean±SD)	8.09±2.29		8.21±2.21		7.53±2.56		8.16±1.81		7.95±2.22		8.23±2.35		7.87±2.71		8.18±2.25		8.08±2.29		8.37±2.05		7.95±2.39		8.12±2.32		8.21±2.52	2.52
Current Corona measures in place to limit SARS-CoV-2…
_are over the top.	395	34.7	313	33.8	82	39.6	36	27.3	146	36.2	175	35.6	38	34.2	18	29	377	35	115	30.7	280	36.7	181	31.3	37	42.5
_are just right.	437	38.4	365	39.4	71	34.3	51	38.6	149	37	193	39.2	44	39.6	30	48.4	407	37.8	147	39.2	290	38	257	44.5	18	20.7
_should be harder.	306	26.9	249	26.9	54	26.1	45	34.1	108	26.8	124	25.2	29	26.1	14	22.6	292	27.1	113	30.1	193	25.3	140	24.2	32	36.8
SARS-CoV-2 coronavirus vaccination received	25	2.2	21	2.3	4	1.9	3	2.3	9	2.2	11	2.2	2	1.8	0	0	25	2.3	4	1.1	21	2.8	14	2.4	1	1.1
If a vaccine against SARS-CoV-2 coronavirus becomes available in the near future, would you get vaccinated?
_No	458	40.2	369	39.8	86	41.5	73	55.3	162	40.2	179	36.4	44	39.6	27	43.5	431	40.1	163	43.5	295	38.7	223	38.6	33	37.9
_Yes	370	32.5	305	32.9	65	31.4	24	18.2	135	33.5	170	34.6	41	36.9	14	22.6	356	33.1	107	28.5	263	34.5	194	33.6	28	32.2
_Maybe	285	25	232	25	52	25.1	32	24.2	97	24.1	132	26.8	24	21.6	21	33.9	264	24.5	101	26.9	184	24.1	147	25.4	25	28.7
_Not specified	25	2.2	21	2.3	4	1.9	3	2.3	9	2.2	11	2.2	2	1.8	0	0	25	2.3	4	1.1	21	2.8	14	2.4	1	1.1
Table S3: Affectedness by influenza and other respiratory diseases
			Gender				Age								COVID-19				Other infectious respiratory diseases				Mental/Emotional Status
	All		F		M		18-30		31-50		51-65		≥66		Yes		No		Yes		No		"Positive"		"Negative"
	N	Perc	N	Perc	N	Perc	N	Perc	N	Perc	N	Perc	N	Perc	N	Perc	N	Perc	N	Perc	N	Perc	N	Perc	N	Perc
Presence of influenza	4	0.4	4	0.4	0	0	0	0	2	0.5	2	0.4	0	0	0	0	4	0.4	0	0	4	0.5	2	0.3	1	1.1
Seasonal flu vaccination received	197	17.3	169	18.2	28	13.5	20	15.2	51	12.7	89	18.1	37	33.3	14	22.6	183	17	70	18.7	127	16.6	99	17.1	16	18.4
Presence of other respiratory infections	375	33	316	34.1	58	28	53	40.2	156	38.7	136	27.6	30	27	17	27.4	358	33.3	375	100	0	0	164	28.4	32	36.8
_Duration of other respiratory diseases days (Mean±SD)	12.53±19.2		11.73±12.08		15.53±38.66		9.7±10.58		11.22±10.95		13.13±14.29		21.57±53.4		12.76±9.36		12.51±19.55		12.53±19.2		0		11.9±11.31		13.5±11.07	11.07
_Severity of other respiratory diseases (NRS 0 = not at all - 10 = fully) (Mean±SD)	6.48±2.27		6.5±2.3		6.34±2.12		6.26±2.29		6.83±2.24		6.21±2.27		6.3±2.25		6.53±1.7		6.48±2.29		6.48±2.27		0		6.1±2.19		7.22±2.79	2.79
Symptoms of other respiratory diseases
_Cough (Mean±SD)	3.5±2.41		3.41±2.37		3.91±2.6		3.19±2.07		3.38±2.38		3.58±2.54		4.3±2.49		3.82±2.74		3.48±2.4		3.5±2.41		0		3.6±2.41		3.78±2.77	2.77
_Common cold (Mean±SD)	4.57±2.15		4.57±2.16		4.55±2.1		4.74±2.04		4.9±2.12		4.12±2.08		4.57±2.51		4.41±2		4.58±2.16		4.57±2.15		0		4.24±2.05		5.34±2.31	2.31
_Hoarseness (Mean±SD)	2.64±2.15		2.71±2.23		2.29±1.68		2.53±2.06		2.45±2.03		2.88±2.34		2.73±2.07		2.53±1.94		2.64±2.16		2.64±2.15		0		2.54±2.1		3.56±2.87	2.87
_Fever (Mean±SD)	1.86±1.73		1.81±1.71		2.09±1.87		1.74±1.46		1.87±1.79		1.8±1.71		2.27±1.95		1.35±0.79		1.88±1.76		1.86±1.73		0		1.82±1.69		2.06±2.12	2.12
_Limb pain (Mean±SD)	2.87±2.46		2.9±2.48		2.67±2.34		2.53±2.29		3.17±2.75		2.72±2.22		2.6±2.11		2.06±1.48		2.91±2.49		2.87±2.46		0		2.49±2.2		4.09±3.05	3.05
_Sore throat (Mean±SD)	3.83±2.31		3.86±2.33		3.59±2.24		4.25±2.24		4.24±2.29		3.34±2.27		3.13±2.24		4.47±2.87		3.8±2.28		3.83±2.31		0		3.39±2.24		4.59±2.63	2.63
_Fatigue (Mean±SD)	4.93±2.69		5.01±2.7		4.41±2.56		4.4±3		5.24±2.77		4.74±2.48		5.03±2.5		4.06±1.82		4.97±2.72		4.93±2.69		0		4.38±2.5		6.09±3.36	3.36
_Headache (Mean±SD)	3.95±2.66		4.1±2.65		3.05±2.52		3.74±2.89		4.31±2.73		3.73±2.54		3.47±2.22		3.47±2.03		3.97±2.68		3.95±2.66		0		3.33±2.39		5.41±3.23	3.23
Table S4: Use of self-care/lifestyle interventions during the COVID-19 pandemic
			Gender				Age								COVID-19				Other infectious respiratory diseases				Mental/Emotional Status
	All		F		M		18-30		31-50		51-65		≥66		Yes		No		Yes		No		"Positive"		"Negative"
	N	Perc	N	Perc	N	Perc	N	Perc	N	Perc	N	Perc	N	Perc	N	Perc	N	Perc	N	Perc	N	Perc	N	Perc	N	Perc
Fasting	436	38.3	369	39.8	66	31.9	49	37.1	143	35.5	204	41.5	40	36	29	46.8	407	37.8	149	39.7	287	37.6	217	37.5	29	33.3
Intermittent fasting	368	32.3	314	33.9	53	25.6	44	33.3	118	29.3	172	35	34	30.6	26	41.9	342	31.8	125	33.3	243	31.8	185	32	26	29.9
_Duration of intermittent fasting (hours/day) (Mean±SD)	15.97±15.13		16.19±16.31		14.68±3.34		14.48±3.22		14.52±3.43		16.03±12.52		22.62±40.26		15.38±2.23		16.01±15.68		16.83±21.18		15.53±10.8		15.41±5.8		13.77±3.33	3.33
_Frequency of intermittent fasting per month (days/month) (Mean±SD)	21.42±24.37		21.96±26.1		18.25±8.92		26.02±46.03		19.61±15.29		21.65±23.68		20.59±8.38		17.73±10.41		21.7±25.11		21.84±30.69		21.2±20.45		20.1±13.38		19.35±10.22	10.22
Therapeutic fasting	96	8.4	82	8.84574	14	6.76329	7	5.30303	32	7.94045	48	9.7561	9	8.10811	5	8.06452	91	8.45725	38	10.1333	58	7.60157	45	7.78547	4	4.5977
Therapeutic fasting (days/year) (Mean±SD)	12±13.19		10.6±6.36		20.21±30.59		5.43±2.15		9.94±6.49		14.44±17.35		11.44±6.42		31±49.85		10.96±7.22		9.34±6.08		13.74±16.07		14.49±17.83		11.75±9.74	9.74
Other fasting (e.g. religious fasting)	32	2.8	25	2.7	7	3.4	5	3.8	14	3.5	12	2.4	1	0.9	1	1.6	31	2.9	9	2.4	23	3	19	3.3	1	1.1
Physical activity	789	69.3	648	69.9	138	66.7	101	76.5	266	66	358	72.8	64	57.7	46	74.2	743	69.1	246	65.6	543	71.2	409	70.8	55	63.2
Endurance sports	648	56.9	531	57.2816	115	55.5556	81	61.3636	219	54.3424	297	60.3659	51	45.9459	39	62.9032	609	56.5985	205	54.6667	443	58.0603	331	57.2664	49	56.3218
_Duration of endurance sports (min./week) (Mean±SD)	259.51±213		259.42±212.98		258.74±212.7		198.58±222.36		216.87±168.58		287.59±216.97		375.88±270.02		202.05±135.32		263.19±216.59		244.59±222.03		266.42±208.59		264.85±216.55		263.16±226.53	226.53
Weight training	197	17.3	156	16.8285	40	19.3237	52	39.3939	72	17.866	65	13.2114	8	7.20721	11	17.7419	186	17.2862	69	18.4	128	16.7759	87	15.0519	16	18.3908
_Duration of weight training (min./week) (Mean±SD)	118.53±139.56		117.37±145.52		124.88±116.32		138.08±167.16		127.92±156.8		93.54±91.79		110±75.59		109.09±79.43		119.09±142.43		127.83±200.47		113.52±92.01		117.41±147.29		86.56±72.68	72.68
Other sport	211	18.5	181	19.5254	29	14.0097	22	16.6667	76	18.8586	94	19.1057	19	17.1171	10	16.129	201	18.6803	61	16.2667	150	19.6592	111	19.2042	11	12.6437
_Duration of other sport (min./week) (Mean±SD)	200.7±209.41		197.75±202.28		184.69±172.85		125.91±95.79		173.12±214.35		240.54±230.07		200.53±132.86		129.5±105.29		204.24±212.8		163.2±194.63		215.95±213.88		235.97±226.66		112.73±85.01	85.01
Sedentary behavior	368	32.3	314	33.8727	53	25.6039	44	33.3333	118	29.2804	172	34.9593	34	30.6306	26	41.9355	342	31.7844	125	33.3333	243	31.848	185	32.0069	26	29.8851
_Duration of sedentary behaviour (minutes/week) (Mean±SD)	7.05±4.84		6.93±4.72		7.58±5.46		7.89±2.7		7.5±6.77		6.45±3		7.41±6.2		7.08±2.86		7.05±4.96		7.96±6.84		6.58±3.31		6.74±3.92		7.12±3.04	3.04
MBM interventions	623	54.7	530	57.2	90	43.5	74	56.1	205	50.9	282	57.3	62	55.9	32	51.6	591	54.9	204	54.4	419	54.9	334	57.8	39	44.8
Yoga	436	38.3	384	41.4239	51	24.6377	66	50	147	36.4764	197	40.0407	26	23.4234	25	40.3226	411	38.197	143	38.1333	293	38.401	222	38.4083	27	31.0345
_Duration of yoga (min./week) (Mean±SD)	124.86±120.97		124.72±118.2		127.16±142.15		77.12±71.53		127.76±122.85		132.6±117.85		170.96±188.55		111.6±125.43		125.66±120.81		101.71±79.93		136.15±135.29		144.26±142.23		104.81±115.18	115.18
Meditation	394	34.6	329	35.4908	64	30.9179	38	28.7879	129	32.0099	189	38.4146	38	34.2342	19	30.6452	375	34.8513	129	34.4	265	34.7313	227	39.2734	20	22.9885
_Duration of meditation (min./week) (Mean±SD)	124.83±145.84		116.91±137.61		164.5±179.17		59.63±58.7		100.4±116.35		147.32±169.12		161.11±141.19		143.11±229.15		123.9±140.73		98.75±88.19		137.52±165.52		148.21±171.57		88.55±62	62
Tai Chi	17	1.5	13	1.40237	4	1.93237	0	0	8	1.98511	8	1.62602	1	0.900901	0	0	17	1.57993	7	1.86667	10	1.31062	9	1.55709	3	3.44828
_Duration of Tai Chi (min./week) (Mean±SD)	51.59±39.64		50.15±42.97		56.25±30.92				50.25±40.01		51.88±44.48		60±0				51.59±39.64		21.71±20.63		72.5±36.46		52.78±44.31		33.33±23.09	23.09
Qi Gong	50	4.4	43	4.63862	7	3.38164	2	1.51515	10	2.48139	28	5.69106	10	9.00901	0	0	50	4.64684	13	3.46667	37	4.84928	31	5.36332	4	4.5977
_Duration of Qi Gong (min./week) (Mean±SD)	83.18±80.01		84.44±80.3		75.43±83.97		16.5±19.09		72±64.9		83.93±63.32		105.6±129.92				83.18±80.01		92.31±112.98		79.97±66.46		74.81±69.34		130±180.74	180.74
Progressive Muscle Relaxation	56	4.9	52	5.60949	4	1.93237	4	3.0303	18	4.4665	28	5.69106	6	5.40541	0	0	56	5.20446	19	5.06667	37	4.84928	27	4.67128	4	4.5977
_Duration of Progressive Muscle Relaxation (min./week) (Mean±SD)	51.91±51.63		47.44±45.65		110±92.74		63.75±98.1		51.78±59.53		43.39±32.52		84.17±63.44				51.91±51.63		48±49.63		53.92±53.19		44.26±39.24		40±35.82	35.82
Autogenic training	56	4.9	47	5.07012	8	3.86473	6	4.54545	20	4.96278	22	4.47154	8	7.20721	1	1.6129	55	5.11152	13	3.46667	43	5.63565	23	3.97924	5	5.74713
_Duration of Autogenic Training (min./week) (Mean±SD)	50.45±46.67		45.11±38.64		81.88±77.36		25.83±19.6		51.7±53.03		49.36±35.59		68.75±67.07		30±0		50.82±47.02		50±53.85		50.58±44.99		50.26±44.88		61±40.68	40.68
Other/different MBM interventions	138	12.1	121	13.0529	17	8.21256	10	7.57576	39	9.67742	73	14.8374	16	14.4144	7	11.2903	131	12.1747	51	13.6	87	11.4024	71	12.2837	12	13.7931
_Duration of other MBM interventions (min./week) (Mean±SD)	166.17±208.51		154.6±155		248.53±428.78		185.5±232.36		134.54±118.25		161.03±165.45		254.69±431.9		223.57±285.55		163.11±204.61		164.22±195.5		167.32±216.87		177.65±246.12		163.33±168.06	168.06
Nature stays	1024	90	845	91.2	177	85.5	107	81.1	356	88.3	459	93.3	102	91.9	57	91.9	967	89.9	335	89.3	689	90.3	517	89.4	75	86.2
Duration of nature stays (min./week) (Mean±SD)	397.43±413.19		395.55±393.39		395.1±474.38		314.34±443.93		361.99±388.9		425.54±406.19		481.83±469.2		360.26±290.85		399.62±419.3		386.73±426.81		402.63±406.62		420.77±420.76		355.67±395.08	395.08
Anthroposophic medicine	132	11.6	109	11.8	23	11.1	5	3.8	35	8.7	68	13.8	24	21.6	2	3.2	130	12.1	48	12.8	84	11	71	12.3	8	9.2
Anthroposophic medicine (min./week) (Mean±SD)	73.95±240.37		79.27±262.73		48.74±66.22		29.6±50.88		122.66±406.52		60.91±162.31		49.08±49.06		615±827.31		65.62±220.82		53.58±93.09		85.58±293.1		73.82±167.69		44.38±43.13	43.13
Eurythmy therapy	26	2.3	17	1.8	9	4.3	1	0.8	5	1.2	13	2.6	7	6.3	0	0	26	2.4	12	3.2	14	1.8	13	2.2	1	1.1
Rhythmical Massage	12	1.1	10	1.1	2	1	0	0	4	1	4	0.8	4	3.6	0	0	12	1.1	3	0.8	9	1.2	8	1.4	1	1.1
Anthroposophic drugs	115	10.1	97	10.5	18	8.7	4	3	32	7.9	60	12.2	19	17.1	2	3.2	113	10.5	45	12	70	9.2	61	10.6	5	5.7
Other/different Anthrop. Medicine	26	2.3	24	2.6	2	1	0	0	6	1.5	15	3	5	4.5	1	1.6	25	2.3	9	2.4	17	2.2	13	2.2	3	3.4
Kneipp/hydrotherapy	193	17	169	18.2	24	11.6	7	5.3	56	13.9	107	21.7	23	20.7	10	16.1	183	17	76	20.3	117	15.3	116	20.1	13	14.9
Duration of Kneipp/hydrotherapy (min./week) (Mean±SD)	52.59±66.33		55.38±69.77		32.88±26.53		33.14±19.73		37.8±35.67		60.82±78.95		56.17±63.7		39.2±20.04		53.32±67.9		59.22±90.97		48.27±43.39		51.26±74.83		65.92±57.16	57.16
Sauna	51	4.5	44	4.7	7	3.4	0	0	12	3	36	7.3	3	2.7	4	6.5	47	4.4	19	5.1	32	4.2	36	6.2	2	2.3
Kneipp water pours	134	11.8	117	12.6	17	8.2	4	3	42	10.4	73	14.8	15	13.5	7	11.3	127	11.8	50	13.3	84	11	83	14.4	8	9.2
Compress	12	1.1	10	1.1	2	1	0	0	3	0.7	8	1.6	1	0.9	0	0	12	1.1	8	2.1	4	0.5	7	1.2	1	1.1
Footbaths	35	3.1	31	3.3	4	1.9	2	1.5	9	2.2	20	4.1	4	3.6	2	3.2	33	3.1	13	3.5	22	2.9	16	2.8	3	3.4
Full baths	38	3.3	32	3.5	6	2.9	1	0.8	16	4	17	3.5	4	3.6	2	3.2	36	3.3	20	5.3	18	2.4	20	3.5	4	4.6
Other/different Kneipp interventions	59	5.2	52	5.6	7	3.4	2	1.5	15	3.7	33	6.7	9	8.1	5	8.1	54	5	23	6.1	36	4.7	41	7.1	5	5.7
Nasal rinses	148	13	124	13.4	24	11.6	7	5.3	48	11.9	73	14.8	20	18	7	11.3	141	13.1	55	14.7	93	12.2	80	13.8	8	9.2
Nasal rinses (applications/week) (Mean±SD)	5.24±10.01		5.03±10.75		6.3±4.65		3.43±4.72		4.31±2.81		5.95±13.87		5.5±3.83		4.71±2.36		5.27±10.25		5.91±15.89		4.84±3.4		4.66±3.34		3.75±2.25	2.25
Naturopathic remedies	718	63.1	612	66	103	49.8	78	59.1	242	60	323	65.7	75	67.6	33	53.2	685	63.7	258	68.8	460	60.3	352	60.9	55	63.2
Digital health services	313	27.5	276	29.8	35	16.9	47	35.6	136	33.7	113	23	17	15.3	19	30.6	294	27.3	114	30.4	199	26.1	138	23.9	22	25.3
Duration of digital health services (Mean±SD)	696.21±2961.3		488.47±1612.61		2354.14±7499.73		953.3±2595.02		758.8±3853.29		581.3±1912.46		248.53±475.71		629.74±2291		700.5±3002.54		411.19±1533.93		859.49±3521.63		956.45±4003.98		1048.79±2318.71	2318.71
Health apps	76	6.7	62	6.7	12	5.8	16	12.1	32	7.9	25	5.1	3	2.7	4	6.5	72	6.7	32	8.5	44	5.8	29	5	6	6.9
Smartwatch to track health parameters	139	12.2	118	12.7	19	9.2	22	16.7	69	17.1	45	9.1	3	2.7	9	14.5	130	12.1	49	13.1	90	11.8	50	8.7	14	16.1
Online health courses	187	16.4	175	18.9	12	5.8	24	18.2	83	20.6	71	14.4	9	8.1	12	19.4	175	16.3	68	18.1	119	15.6	82	14.2	12	13.8
Other/different digital health services	47	4.1	40	4.3	6	2.9	5	3.8	19	4.7	18	3.7	5	4.5	1	1.6	46	4.3	13	3.5	34	4.5	27	4.7	3	3.4
Aroma therapy	153	13.4	144	15.5	8	3.9	8	6.1	60	14.9	76	15.4	9	8.1	6	9.7	147	13.7	59	15.7	94	12.3	77	13.3	9	10.3
Duration of aromatherapy (min./week) (Mean±SD)	331.48±711.73		290.92±603.99		577.88±1142.83		83.75±78		352.67±699.92		359.12±789.98		177±238.49		140.83±142.49		339.26±724.66		346.58±793.25		322±659.74		330.05±769.21		655±1132.42	1132.42
External application as hand disinfection	45	4	41	4.4	4	1.9	0	0	16	4	27	5.5	2	1.8	1	1.6	44	4.1	14	3.7	31	4.1	28	4.8	0	0
Room scenting, e.g. via diffuser, fragrance stone	136	12	129	13.9	6	2.9	8	6.1	56	13.9	66	13.4	6	5.4	6	9.7	130	12.1	52	13.9	84	11	69	11.9	8	9.2
Aromatherapy as internal application	30	2.6	30	3.2	0	0	1	0.8	11	2.7	17	3.5	1	0.9	1	1.6	29	2.7	13	3.5	17	2.2	17	2.9	1	1.1
Other/different aroma therapy interventions	40	3.5	36	3.9	4	1.9	0	0	12	3	23	4.7	5	4.5	2	3.2	38	3.5	13	3.5	27	3.5	23	4	2	2.3
Other complementary interventions	300	26.4	266	28.7	34	16.4	6	4.5	92	22.8	165	33.5	37	33.3	15	24.2	285	26.5	99	26.4	201	26.3	167	28.9	21	24.1
Table S5: Diet during the COVID-19 pandemic
			Gender				Age								COVID-19				Other infectious respiratory diseases				Mental/Emotional Status
	All		F		M		18-30		31-50		51-65		≥66		Yes		No		Yes		No		"Positive"		"Negative"
	N	Perc	N	Perc	N	Perc	N	Perc	N	Perc	N	Perc	N	Perc	N	Perc	N	Perc	N	Perc	N	Perc	N	Perc	N	Perc
Diet most of the time since March 2020
Omnivor	372	32.7	295	31.8	76	36.7	22	16.7	117	29	183	37.2	50	45	22	35.5	350	32.5	128	34.1	244	32	199	34.4	34	39.1
Omnivor without fish	26	2.3	25	2.7	1	0.5	4	3	10	2.5	10	2	2	1.8	2	3.2	24	2.2	12	3.2	14	1.8	7	1.2	3	3.4
Pescetarian	100	8.8	84	9.1	16	7.7	2	1.5	33	8.2	55	11.2	10	9	5	8.1	95	8.8	41	10.9	59	7.7	42	7.3	10	11.5
Ovo-lacto-vegetarian	177	15.6	147	15.9	29	14	21	15.9	81	20.1	63	12.8	12	10.8	8	12.9	169	15.7	59	15.7	118	15.5	82	14.2	18	20.7
Lacto-vegetarian	41	3.6	30	3.2	11	5.3	4	3	11	2.7	17	3.5	9	8.1	0	0	41	3.8	8	2.1	33	4.3	24	4.2	1	1.1
Ovo-vegetarian	51	4.5	47	5.1	4	1.9	6	4.5	18	4.5	20	4.1	7	6.3	1	1.6	50	4.6	17	4.5	34	4.5	30	5.2	1	1.1
Vegan	365	32.1	296	31.9	67	32.4	73	55.3	133	33	140	28.5	19	17.1	22	35.5	343	31.9	109	29.1	256	33.6	190	32.9	19	21.8
Vegan raw food	6	0.5	3	0.3	3	1.4	0	0	0	0	4	0.8	2	1.8	2	3.2	4	0.4	1	0.3	5	0.7	4	0.7	1	1.1
How many days a week do you eat at least two units of fruit? (One unit is an apple, banana etc.) (Mean±SD)	4.97±2.12		5.07±2.06		4.56±2.3		4.61±2.22		4.7±2.13		5.19±2.05		5.4±2.07		5.2±1.8		4.96±2.14		4.89±2.22		5.01±2.07		5.03±2.11		4.64±2.3	2.3
How many days a week do you eat a meal that consists of at least one-third of vegetables? (Mean±SD)	5.96±1.46		6.04±1.39		5.6±1.7		6.13±1.2		5.9±1.47		5.95±1.52		6.07±1.43		5.77±1.52		5.98±1.46		5.91±1.53		5.99±1.42		6.06±1.41		5.45±1.69	1.69
How many days a week do you eat meat (without sausage)? (Mean±SD)	0.81±1.34		0.78±1.29		0.93±1.54		0.45±1.07		0.72±1.31		0.92±1.4		1.01±1.35		0.87±1.36		0.8±1.34		0.86±1.41		0.78±1.3		0.77±1.28		1.07±1.49	1.49
How many days a week do you eat sausage (incl. salami)? (Mean±SD)	0.68±1.42		0.62±1.32		0.99±1.77		0.32±0.87		0.65±1.4		0.71±1.39		1.14±1.93		0.68±1.36		0.69±1.42		0.74±1.41		0.66±1.43		0.67±1.4		1.1±1.79	1.79
How many days a week do you eat fish? (Mean±SD)	0.66±0.87		0.65±0.84		0.71±0.99		0.27±0.58		0.59±0.88		0.76±0.84		0.94±1.09		0.67±0.89		0.66±0.87		0.7±0.88		0.65±0.87		0.67±0.91		0.85±0.94	0.94
How many days a week do you eat fatty foods like cake, chips, or pizza? (Mean±SD)	1.57±1.26		1.53±1.23		1.75±1.4		1.52±1.06		1.75±1.25		1.5±1.25		1.32±1.53		1.65±1.37		1.57±1.26		1.72±1.33		1.5±1.23		1.54±1.35		1.88±1.37	1.37
How many days a week do you eat processed foods such as frozen pizza? (Mean±SD)	0.56±0.86		0.52±0.81		0.72±1		0.66±0.91		0.75±0.96		0.44±0.75		0.29±0.7		0.56±0.81		0.56±0.86		0.65±0.9		0.51±0.83		0.5±0.83		0.81±1.14	1.14
How many days a week do you eat according to the principles of Ayurveda? (Mean±SD)	0.84±1.69		0.86±1.7		0.74±1.63		0.38±0.96		0.77±1.65		1±1.81		0.9±1.82		0.64±1.22		0.85±1.71		0.76±1.62		0.88±1.72		1.03±1.87		0.45±1.02	1.02
How many days a week do you eat according to the principles of Traditional Chinese Medicine? (Mean±SD)	0.32±1.06		0.34±1.08		0.22±0.99		0.19±0.72		0.25±0.99		0.41±1.23		0.27±0.82		0.2±0.62		0.32±1.08		0.23±0.87		0.36±1.15		0.38±1.22		0.42±1.19	1.19
On average, what percentage of your diet has come from organically grown produce since March 2020?	66.27	24.44	66.87	23.99	63.62	26.42	57.2	22.79	65.76	24.09	68.92	23.74	67.12	28.04	65.65	22	66.3	24.58	66.29	24.15	66.25	24.59	69.69	23.75	57.82	26.65
Table S6: Questionaires and mental/emotional state
			Gender				Age								COVID-19				Other infectious respiratory diseases				Mental/Emotional Status
	All		F		M		18-30		31-50		51-65		≥66		Yes		No		Yes		No		"Positive"		"Negative"
	N	Perc	N	Perc	N	Perc	N	Perc	N	Perc	N	Perc	N	Perc	N	Perc	N	Perc	N	Perc	N	Perc	N	Perc	N	Perc
General Self-Efficacy Short Scale, GSE-3 (Mean±SD)	4.13±0.58		4.11±0.56		4.23±0.66		3.99±0.55		4.13±0.61		4.17±0.56		4.17±0.58		4.21±0.57		4.13±0.58		4.05±0.59		4.17±0.58		4.26±0.54		3.78±0.8	0.8
World Health Organization Well-Being Index, WHO-5 (Mean±SD)	15.19±5		14.96±5.07		16.25±4.53		14.05±4.52		14.7±4.99		15.55±4.99		16.76±5.12		14.55±4.66		15.23±5.01		14.04±5.19		15.76±4.8		17.38±4.01		9.48±4.98	4.98
Mental/emotional state since March 2020 (NRS 0-10)
How have you felt since the SARS-CoV-2 pandemic began in Europe (approximately March 2020)?
Stressed (Mean±SD)	4.43±2.74		4.56±2.74		3.88±2.73		5.27±2.5		4.81±2.65		4.28±2.79		2.72±2.36		4.58±2.66		4.42±2.75		4.93±2.65		4.18±2.76		2.67±2.03		7.8±1.58	1.58
Anxious (Mean±SD)	2.7±2.48		2.84±2.49		2.05±2.38		3.55±2.69		2.88±2.4		2.59±2.49		1.5±2		2.77±2.54		2.69±2.48		3.18±2.55		2.46±2.42		1.32±1.42		6.71±2.48	2.48
Depressed (Mean±SD)	2.99±2.78		3.04±2.75		2.7±2.86		4.45±2.67		3.29±2.83		2.67±2.67		1.54±2.15		2.82±2.79		3±2.78		3.45±2.79		2.76±2.74		1.33±1.71		7.34±1.99	1.99
Exhaustion (Mean±SD)	4.01±2.82		4.14±2.79		3.43±2.88		4.58±2.62		4.31±2.81		3.92±2.82		2.63±2.62		4.39±2.82		3.99±2.82		4.34±2.8		3.85±2.81		2.12±1.72		8.16±1.5	1.5
Fear of being infected with SARS-CoV-2 (Mean±SD)	2.38±2.39		2.49±2.37		1.86±2.36		2.77±2.42		2.45±2.28		2.4±2.51		1.57±1.99		2.31±2.51		2.38±2.38		2.75±2.51		2.2±2.3		1.32±1.39		5.6±3.16	3.16
Fear of financial / economic consequences due to the SARS-CoV-2 pandemic (Mean±SD)	3.31±3.03		3.37±3		2.99±3.13		3.34±3.02		3.24±2.9		3.62±3.12		2.15±2.84		2.97±3.01		3.33±3.03		3.29±2.91		3.31±3.09		1.78±2.04		7.39±2.71	2.71
Fear of negative societal consequences (e.g. loneliness, social inequality, political decisions) due to the SARS-CoV-2 pandemic (Mean±SD)	5.14±3.12		5.24±3.06		4.67±3.34		6.02±2.96		5.33±2.99		5.04±3.17		3.82±3.11		4.76±3.09		5.16±3.12		5.24±3.08		5.09±3.14		3.39±2.62		8.62±1.9	1.9
Average sleep quality (Mean±SD)	3.79±2.74		3.88±2.71		3.37±2.82		4.14±2.66		4±2.79		3.78±2.69		2.63±2.54		3.74±2.79		3.79±2.73		4.18±2.72		3.6±2.72		2.49±2.33		6.75±2.4	2.4
